# Supplementary material
Source: publisher figshare collection journal article supplement (https://sage.figshare.com/ndownloader/files/12540212)
Supplement: Supplementary file 1 [file 12540212]

Table S1. List of ADRD-focused mobile applications reviewed

| <b>AppName</b>                                                                                                 | <b>Developer</b>                                  | <b>Platform</b> |
|----------------------------------------------------------------------------------------------------------------|---------------------------------------------------|-----------------|
| A Walk Through Dementia                                                                                        | Alzheimer's Research UK                           | Android         |
| AD8                                                                                                            | Washington University in St. Louis                | iOS, Android    |
| ALZHEIMER'S UNIVERSE (AlzU)                                                                                    | AtPlayMusic                                       | iOS             |
| Accessible Alzheimers And Dementia Care [ <i>iOS</i> ]<br>Alzheimers & Dementia Care [ <i>Android</i> ]        | Accessible Home Health Care                       | iOS, Android    |
| Alzheimer's and Dementia Tips for Families                                                                     | Peter Ericksen                                    | iOS             |
| Alzheimer's and Parkinson's Disease by GoLearningBus                                                           | Wag Mobile Software Services Pvt. Ltd.            | iOS             |
| Alzheimer's Caregiver Buddy                                                                                    | Alzheimer's Association, Greater Illinois Chapter | iOS, Android    |
| Alzheimer's & Other Dementias Daily Companion [ <i>iOS</i> ]<br>Alzheimer's Daily Companion [ <i>Android</i> ] | Home Instead Senior Care                          | iOS, Android    |
| CAIDE Risk Score App                                                                                           | Merz Pharmaceuticals GmbH                         | iOS             |
| Care4Dementia                                                                                                  | The University of New South Wales                 | iOS, Android    |
| Caring in Place®                                                                                               | Caring in Place, Inc.                             | iOS             |
| Cultura: An Alzheimer's Australia SA Initiative                                                                | Alzheimer's Australia SA Inc                      | iOS             |
| Dementia!                                                                                                      | 9to5AppStore                                      | Android         |
| Dementia Care                                                                                                  | Care Council for Wales                            | iOS             |
| Dementia Early Signs - Free                                                                                    | Global Appz Company                               | Android         |
| Dementia Emergency                                                                                             | Dignity in Dementia                               | iOS, Android    |
| Dementia Guide Expert for families                                                                             | University of Illinois at Urbana-Champaign        | iOS, Android    |
| Dementia Solutions                                                                                             | Sunsoft                                           | iOS, Android    |
| Dementia Support                                                                                               | Swedish Care International                        | iOS, Android    |
| Dementia test - risk calculator of dementia                                                                    | Pears Health Cyber                                | iOS             |
| DementiAssist                                                                                                  | Baylor University Medical Center                  | iOS, Android    |
| Elderly Care SCI                                                                                               | Swedish Care International AB                     | iOS             |

|                                                |                                               |              |
|------------------------------------------------|-----------------------------------------------|--------------|
| ElderApp                                       | 919Games, LLC                                 | iOS          |
| Find risk                                      | NamyXC                                        | Android      |
| Hospice of Southern Illinois App               | Hospice of Southern Illinois, Inc             | iOS          |
| Living and Dying Well With Dementia            | Footsqueek, Inc                               | iOS, Android |
| Memory Repair Protocol                         | Afliaps                                       | Android      |
| MindMate - Training for Brain & Body           | MINDMATE LTD.                                 | iOS          |
| MindQ - Brief Cognitive Scale                  | Holmusk                                       | iOS          |
| My Brain - Check Alzheimer                     | Naman Tiwari Spn                              | Android      |
| Oxleas Dementia                                | NHS Leicestershire Health Informatics Service | Android      |
| Pathways through dementia                      | Mobile App Design HQ                          | iOS          |
| Senior Memory Quiz - Are You Getting Dementia? | Stall Senior Medical LLC                      | iOS          |
| Young Onset Dementia (YOD)                     | Leicestershire Partnership NHS Trust          | iOS, Android |
| Zerovision - Personnel                         | Svenskt Demenscentrum                         | Android      |
| Zerovision - Relative                          | Svenskt Demenscentrum                         | Android      |
